# Supplementary material
Source: Frontiers journal article supplement (https://www.frontiersin.org/articles/397890)
Supplement: Data_Sheet_1.pdf [file Data_Sheet_1.pdf]

## Appendix A - Speaker Topics and Primary Themes

| Topic                                                        | Speaker                            | Primary Theme                                                                                                                                                                |
|--------------------------------------------------------------|------------------------------------|------------------------------------------------------------------------------------------------------------------------------------------------------------------------------|
| Neuroaesthetics                                              | Anjan Chatterjee, MD               | (see text)                                                                                                                                                                   |
| Neurodegenerative Disease and Creative Art Therapies         | Robert Pascuzzi, MD                | The necessity of a range of therapeutics for patient and caregiver and call for research that uses conventional scientific methods to establish proof.                       |
| Empathy in Medical Student Education                         | Emily Beckman, MA, DMH             | The use of narrative and storytelling to develop moral imagination and create empathy in medical learning                                                                    |
| Art Therapy and Neuroscience                                 | Juliet King, MA, ATR-BC, LPC, LMHC | The continuum of scientific inquiry and how art, therapies and neuroscience research enhance all disciplines                                                                 |
| Art Therapy and Continuous Traumatic Stress                  | Myra Saad, MA, ATR                 | The distinction of continuous traumatic stress from other types of trauma and the importance of a humanitarian approach to art therapy centered in the continuity principle. |
| Neuroscience of Creativity and Consciousness                 | Arne Dietrich, PhD                 | (see text)                                                                                                                                                                   |
| Arts and Humanities in Medicine and Education                | Jeffrey Rothenberg, MD, MS         | The value of visual strategies to hone thinking skills and the integration of art to encourage empathic and humanistic healers                                               |
| Epilepsy Self-Management                                     | Janice Buelow, RN, PhD, FAAN       | The use of art therapy to improve the communicative capacities for people who have epilepsy.                                                                                 |
| Dance Movement Therapy                                       | Heidi Fledderjohn, MA, BC-DMT, RYT | How Dance Movement Therapy engages the nervous system and the use of the body to translate and communicate our emotional states and interaction with the environment.        |
| Art as Pilgrimage and Sanctuary                              | Jawshing Arthur Liou, MFA          | Art making as a medium for distancing the source of tragedy and providing a means to confront it.                                                                            |
| Design for Healing Environment/Art Design for Civic Practice | Michael Kaufmann, MLIS             | How to create space to support better health outcomes and to facilitate a social infrastructure that can transcend barriers of language and culture.                         |
| Mobile Brain-Body Imaging                                    | Klaus Gramann, PhD                 | (see text)                                                                                                                                                                   |
| Psychological Distress and Dissociation                      | Petr Bob, PhD                      | Correlations between Freudian theories and contemporary neurobiological understanding of stress, traumatic memory and dissociation.                                          |
| Music Therapy: Music Based Interventions                     | Debra Burns, PhD, MT-BC            | How the music therapist uses both external evidence from research studies and internal understanding of the meaning of music to create interventions for patients.           |

|                                                               |                     |                                                                                                                                                                                                         |
|---------------------------------------------------------------|---------------------|---------------------------------------------------------------------------------------------------------------------------------------------------------------------------------------------------------|
| Informatics: The Science and Art of Gameplay                  | Travis Faas, MS     | The use of Virtual Reality in gameplay and the use of EEG and GSR to generate data through human interaction with the games themselves.                                                                 |
| Neuroscience, Multi-Modal Imaging and Creative Arts Therapies | Lukasz Konopka, PhD | The brain as an oscillator; the use of EEG and technology to evaluate patient vulnerabilities and recommend more specific forms of therapeutic intervention which includes the Creative Arts Therapies. |
